# Supplementary material for: Super-alkalis as building blocks of one-dimensional hierarchical electrides
Source: Royal Society of Chemistry journal article supplement (doi:10.1039/c8nr07609j), 2018-01-01

## Supporting Information

### "Super-alkalis as Building Blocks of One-Dimensional Hierarchical Electride"

Hong Fang <sup>\*,‡,§</sup>, Jian Zhou<sup>†,§</sup> and Puru Jena<sup>\*,‡</sup>

<sup>‡</sup>Department of Physics, Virginia Commonwealth University, Richmond, VA 23284,  
United States.

<sup>†</sup>Center for Advancing Materials Performance from the Nanoscale, State Key Laboratory  
for Mechanical Behavior of Materials, Xi'an Jiaotong University, Xi'an, 710049, China.

<sup>§</sup>These are co-first authors.

\*[pjena@vcu.edu](mailto:pjena@vcu.edu) (P.J.); [hfangtom@gmail.com](mailto:hfangtom@gmail.com) (H.F.)

**Figure S1.** (a) Optimized structure of  $\text{Li}_3\text{O}$  cluster in a planar configuration. (b) Molecular dynamics simulation at 300 K for a perovskite structure  $\text{Li}_3\text{OGeI}_3$ , where  $\text{Li}_3\text{O}$  clusters are serving as cations. The clusters self-assemble into chain structures.

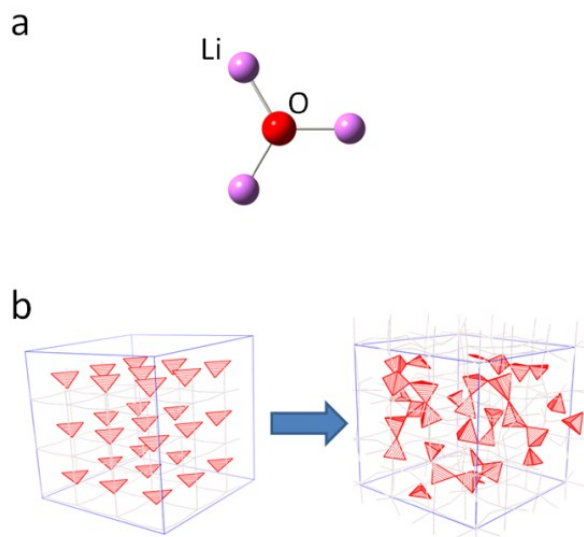

**Figure S2.** Optimized structure of three-dimensional  $\text{Li}_3\text{O}$  assuming it has the same crystal structure as  $\text{Cs}_3\text{O}$ .

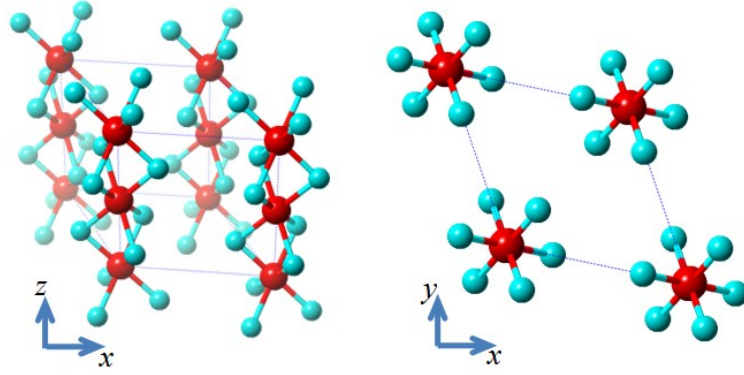

**Figure S3.** Calculated Li-O phase diagram, where  $\text{Li}_3\text{O}$  is found to be above the convex hull.

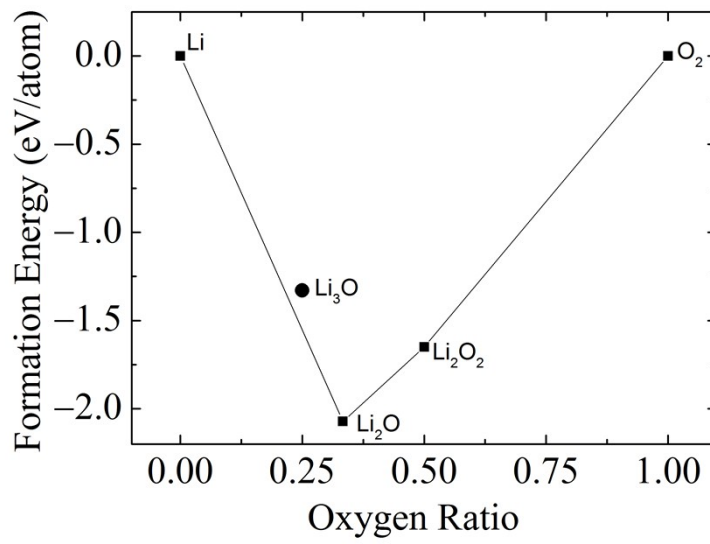

**Figure S4.** The snapshot of 1D  $1\times 1\times 6$   $\text{Li}_3\text{O}$  after simulations at 300 for 5 ps. The structure remains stable.

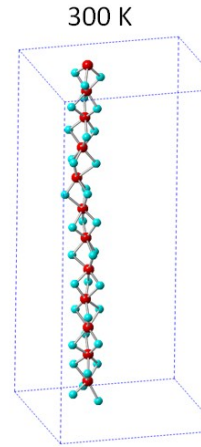

**Figure S5.** Calculated work functions of  $\text{Li}_3\text{O}$  and  $\text{Li}_3\text{O}@$ BNNT. The Fermi energies for the two are  $-2.36$  and  $-1.51$  eV, respectively.

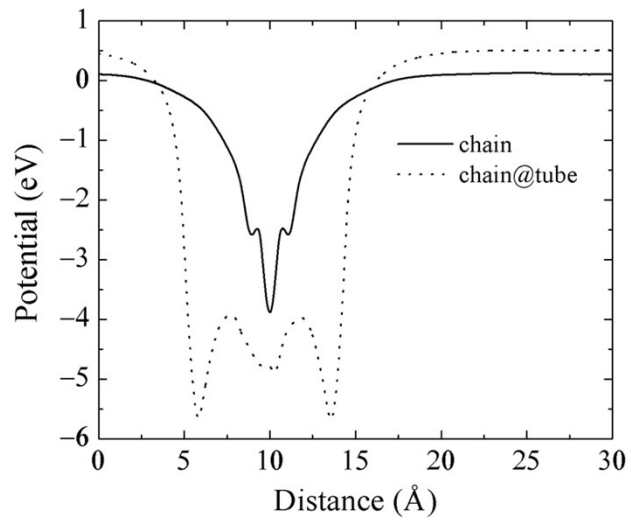

**Figure S6.** Optimized structure of the unit cell of  $\text{Li}_3\text{O@BNNT}$  activating four  $\text{CO}_2$  molecules at once.

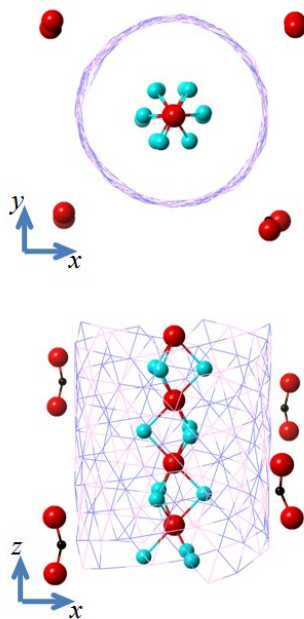

Supplement: c8nr07609j1.pdf [file c8nr07609j1.pdf]
